# Supplementary material
Source: Springer Nature journal article supplement (https://www.springermedizin.de/resource/supplementary/12930_2013_60_MOESM2_ESM.pdf/9424664)
Supplement: MOESM2 [file 9424664]

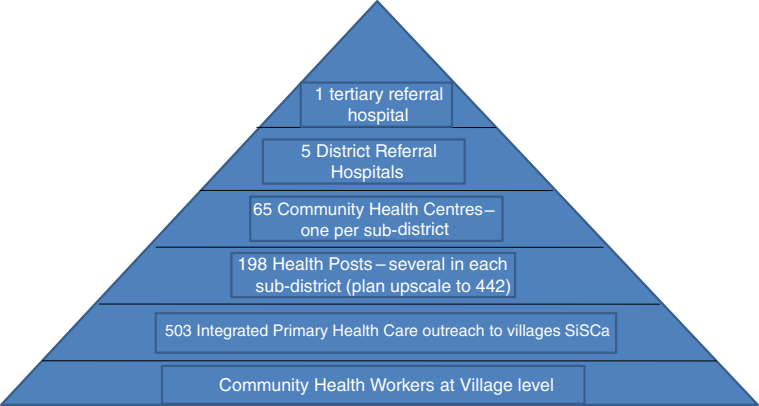

1 tertiary referral hospital

5 District Referral Hospitals

65 Community Health Centres – one per sub-district

198 Health Posts – several in each sub-district (plan upscale to 442)

503 Integrated Primary Health Care outreach to villages SiSCa

Community Health Workers at Village level
